# Supplementary material
Source: PubMed Central journal article supplement (PMC3896499)
Supplement: fly-7-263-s01.pdf [file fly-7-263-s01.pdf]

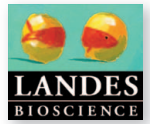

## **Supplemental Material to:**

**Viktor Honti, Gyöngyi Cinege, Gábor Csordás, Éva Kurucz,  
János Zsámboki, Cory J. Evans, Utpal Banerjee,  
and István Andó**

**Variation of NimC1 expression in Drosophila stocks and  
transgenic strains**

**Fly 2013; 7(4)**

**<http://dx.doi.org/10.4161/fly.25654>**

**<http://www.landesbioscience.com/journals/fly/article/25654>**

**Supplemental Table 1.** Oligonucleotide primers used in this study.

| Primer        | Sequence (5' to 3')              | Isoform specificity |
|---------------|----------------------------------|---------------------|
| P11exonF      | GAACTCGAGTGGGATAAACAAATGCTCAGATA | none                |
| P11exonR      | GAACTCGAGTGCCAAAGGACAATGACAG     | B                   |
| P1isoBfw      | GTCATTGTCCTTTGGCACAA             | B                   |
| P1B600rev     | AGCTATGGTGTCCACATTCC             | A, B                |
| P11189fw      | AAGGAATGTGGACACCATAG             | A, B                |
| P11189rev     | CGCAGGAGCCTACGATAATC             | A, B                |
| P1utan600fw   | AACTGGATCGTCTAACAAAGT            | A, B                |
| P1utan300rev  | GGATTGATTAACCACACAGA             | none                |
| P1A2          | TGGAGTGGTTGGCAGACAAA             | A                   |
| P1del.utanA,B | ACGTTGCACTCGCACACATT             | A, B                |
| Hemesefw      | TCAACTGACCGTCGTTTTCC             | none                |
| Hemeserev     | CCGTTTCACTTGGGGTTGAA             | none                |

**Supplemental Table 2.** List of confirmed P1 negative *Drosophila* lines.

| Genotype:                                                  | Chromosome:                           | Source:                                   |
|------------------------------------------------------------|---------------------------------------|-------------------------------------------|
| <i>w; upd3-Gal4/CyO</i>                                    | negative (balanced stock is positive) | N. Perrimon <sup>1</sup>                  |
| <i>w; UAS-upd3 RNAi</i>                                    | negative                              | N. Perrimon <sup>1</sup>                  |
| <i>w<sup>1118</sup>; Hml-Gal4.Δ, UAS-2XEGFP</i> (BSC30140) | negative                              | S. Sinenko, B. Mathey-Prevot <sup>2</sup> |
| <i>w<sup>1118</sup>; Cg-Gal4</i> (BSC7011)                 | negative                              | C. Dearolf <sup>3</sup>                   |
| <i>w<sup>1118</sup></i> (BSC6326)                          | negative                              | Bloomington Stock Center                  |

|                                                            |          |                               |
|------------------------------------------------------------|----------|-------------------------------|
| $y^* w^*$ ; <i>LNI-Gal4</i> (NP1227)                       | negative | DGRC/Japan                    |
| $w^*$ ; <i>OR42a-Gal4</i>                                  | negative | L. Vosshall <sup>4</sup>      |
| $y^* w^*$ ; <i>Tep4-Gal4</i> (NP7379)                      | negative | DGRC/Japan                    |
| $w$ ; <i>GBR-Gal4</i>                                      | negative | C.M. Root <sup>5</sup>        |
| $w^*$ ; <i>UAS-CamKII</i> (BSC29662)                       | negative | L. Griffith <sup>6</sup>      |
| $y^J, w^{1118}$ , <i>UAS-FLP</i> ; <i>Ay-GAL4, UAS-GFP</i> | negative | Exelixis; K. Ito <sup>7</sup> |
| $w^*$ ; <i>crq-Gal4</i>                                    | negative | B. Olofsson <sup>8</sup>      |

### References for Supplemental Table 2.

1. Agaisse H, Petersen U.M, Boutros M, Mathey-Prevot B, Perrimon N. Signaling role of hemocytes in *Drosophila* JAK/STAT-dependent response to septic injury. *Dev. Cell* 2003; 5:441-50.
2. Sinenko S.A, Mathey-Prevot B. Increased expression of *Drosophila* tetraspanin, Tsp68C, suppresses the abnormal proliferation of *ytr*-deficient and Ras/Raf-activated hemocytes. *Oncogene* 2004; 23:9120-8.
3. Asha H, Nagy I, Kovács G, Stetson D, Andó I, Dearolf C.R. Analysis of ras-induced overproliferation in *Drosophila* hemocytes. *Genetics* 2003; 163:203-15.
4. Vosshall L. Vosshall *Or-GAL4* insertions. 2008; Personal communication to FlyBase.
5. Root C.M, Masuyama K, Green D.S, Enell L.E, Nässel D.R, Lee C.H, Wang J.W. A presynaptic gain control mechanism fine-tunes olfactory behavior. *Neuron* 2008; 59:311-21.
6. Griffith L. *UAS-CaMKII* insertions. 2010; Personal communication to FlyBase.
7. Ito K, Awano W, Suzuki K, Hiromi Y, Yamamoto D. The *Drosophila* mushroom body is a quadruple structure of clonal units each of which contains a virtually identical set of neurones and glial cells. *Development* 1997; 124:761-71.

8. Olofsson B, Page D.T. Condensation of the central nervous system in embryonic *Drosophila* is inhibited by blocking hemocyte migration or neural activity. Dev. Biol. 2005; 279:233-43.
